# Supplementary material
Source: publisher figshare collection journal article supplement (https://karger.figshare.com/ndownloader/files/35902910)
Supplement: Supplementary file 1 [file 35902910]

**Supplementary Figure 4:** Accumulation of CD4+ (A) and FOXP3+ (B) cells in IBC tissues according to the molecular subtype of the tumour.

**
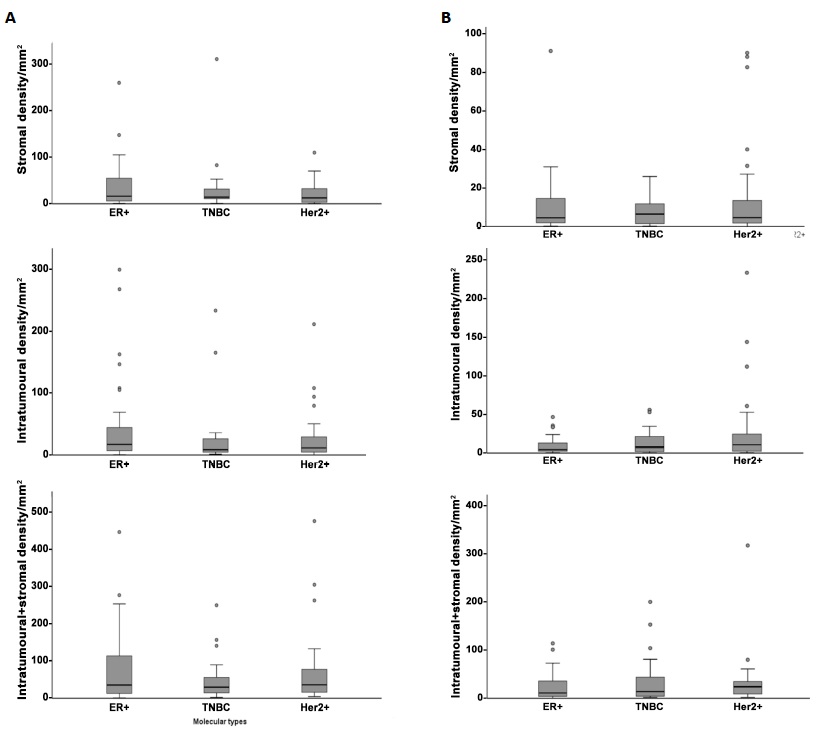
**
